# Supplementary material for: A low-cost paper-based flexible energy storage device using a conducting polymer nanocomposite
Source: Royal Society of Chemistry journal article supplement (doi:10.1039/d0nj02158j), 2020-01-01
Supplement: d0nj02158j1.pdf [file d0nj02158j1.pdf]

**Electronic Supplementary Information:**

**Low cost paper based flexible energy storage device using conducting polymer  
nanocomposite**

**Rama Devi<sup>a</sup>, Kavita Tapadia<sup>a</sup>, Tushar Kant,<sup>b</sup> Archana Ghosale,<sup>c</sup> Kamlesh Shrivastava<sup>b\*</sup>**

**Indrapal Karbhal<sup>b</sup> and Tungabidya Maharana<sup>a\*</sup>**

**<sup>a</sup>Department of Chemistry, National Institute of Technology, Raipur, CG, 492010, India**

**<sup>b</sup>School of Studies in Chemistry, Pt. Ravishankar Shukla University, Raipur,**

**CG, 492010, India**

**<sup>c</sup>Department of Chemistry, Govt. Lochan Prasad Pandey College, Sarangarh, Raigarh,**

**CG, 496445, India**

Corresponding Authors email:

mtungabidya@gmail.com (TM) and kshrivas@gmail.com (KS)

**Table S1.** Effect of polymerization time of pyrrole on Ni@PPy on electrical conductivity in as compared to bare PPy

| Polymerization<br>Time (min) | Electrical<br>Conductivity (S cm <sup>-1</sup> ) | Weight<br>(mg) | Coating thickness<br>(mm) |
|------------------------------|--------------------------------------------------|----------------|---------------------------|
| 5                            | 8.91                                             | 0.3            | 0.04                      |
| 30                           | 39.2                                             | 0.9            | 0.23                      |
| 60                           | 58.6                                             | 1.1            | 0.62                      |
| 120                          | 105                                              | 1.8            | 1.21                      |

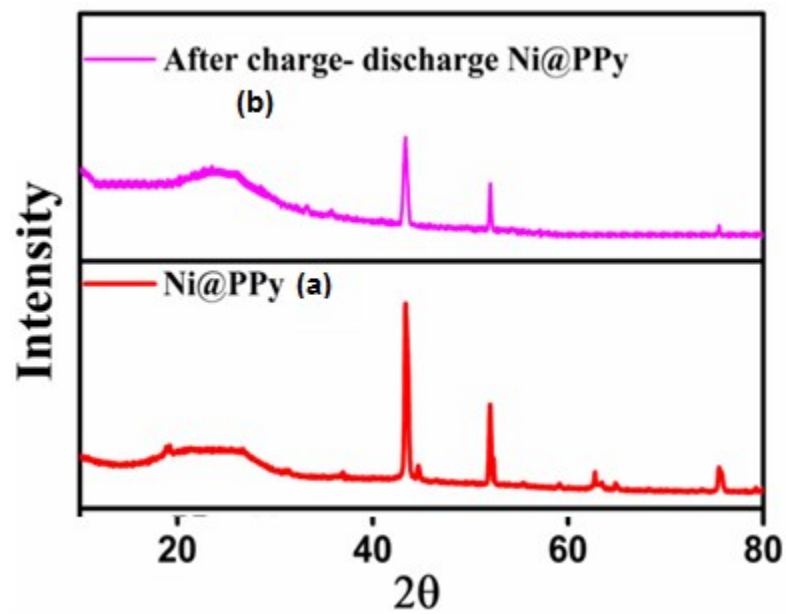

**Fig. S1.** XRD analysis of (a) Ni@PPy paper electrode and (b) Ni@PPy paper electrode after the 3000 charge and discharge cycles

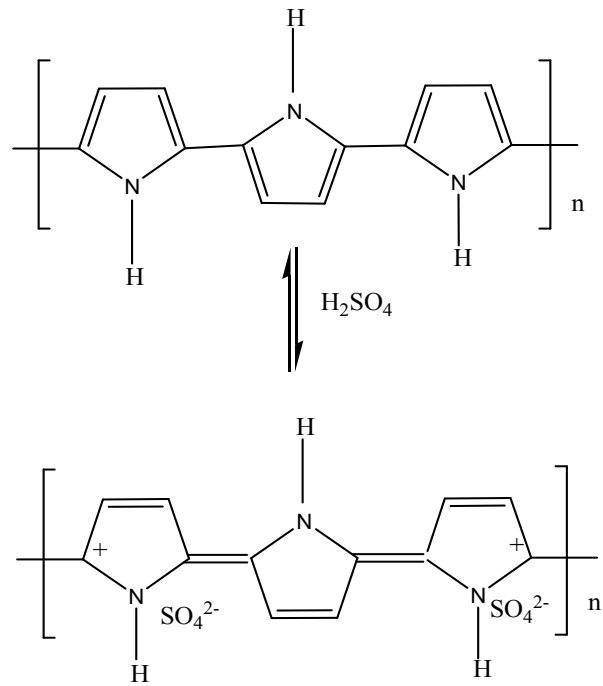

**Fig. S2.** Energy storage mechanism of PPy .

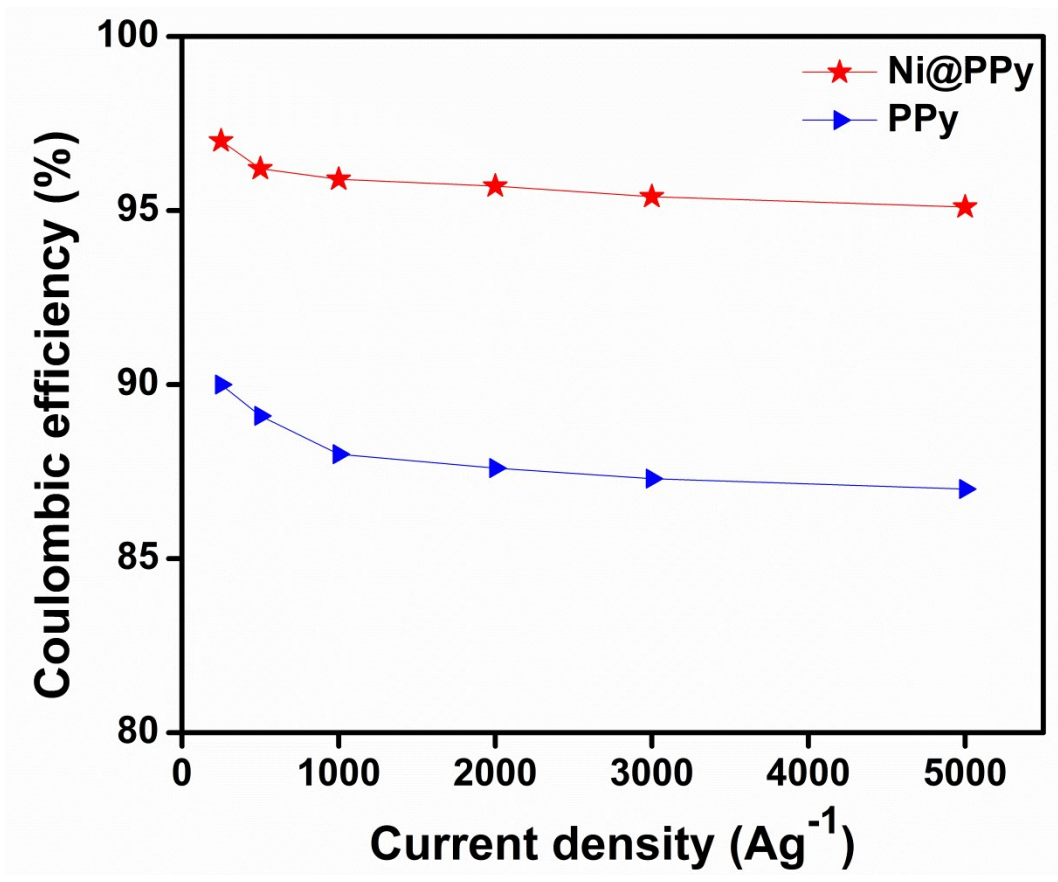

**Fig. S3.** The calculated coulombic efficiency of PPy and Ni@PPy nanocomposite at different current density.

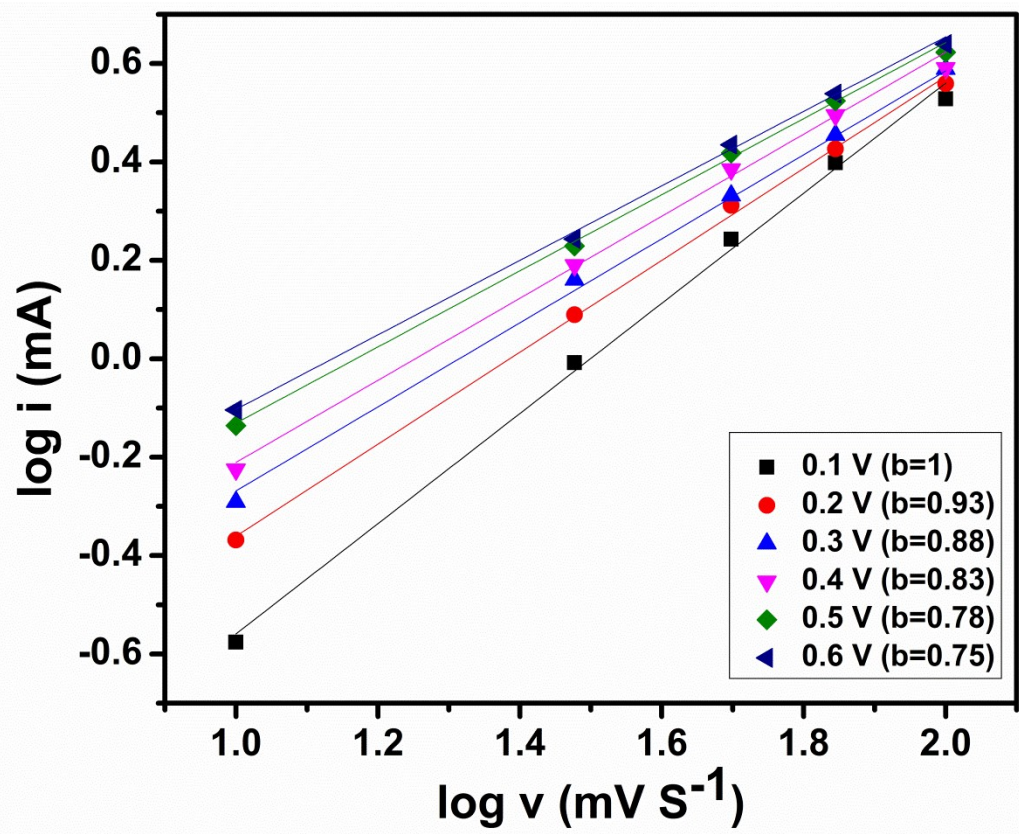

Fig. S4.  $\log(i)$  vs  $\log(v)$  plot of Ni@PPy nanocomposite.
